# Supplementary material for: Assessment of the Concentration of Endogenous Factors Regulating Angiogenesis, VASH‐1 and VEGF‐A, in the Blood Serum of Patients with Neuroendocrine Neoplasms
Source: Hindawi journal article supplement (doi:10.1155/2022/9084393), 2022-01-01
Supplement: f1 [file 9084393.f1.pdf]

**Table S1.** Spearman rank correlation coefficients and p-values for the study group.

| Study group                 | VASH-1       |              | VEGF-A |       | Age         |              | BMI          |              | Chromogranin A |              | Serotonin    |              | 5-hydroxyindole acetic acid |              | Glucose     |              | Total cholesterol |              | Triglycerides |              |
|-----------------------------|--------------|--------------|--------|-------|-------------|--------------|--------------|--------------|----------------|--------------|--------------|--------------|-----------------------------|--------------|-------------|--------------|-------------------|--------------|---------------|--------------|
|                             | rs           | p            | rs     | p     | rs          | p            | rs           | p            | rs             | p            | rs           | p            | rs                          | p            | rs          | p            | rs                | p            | rs            | p            |
| VASH-1                      | 1.00         | 0.000        | -0.08  | 0.361 | 0.11        | 0.244        | 0.09         | 0.312        | -0.02          | 0.847        | <b>-0.19</b> | <b>0.036</b> | 0.07                        | 0.469        | <b>0.19</b> | <b>0.038</b> | -0.02             | 0.825        | 0.01          | 0.904        |
| VEGF-A                      | -0.08        | 0.361        | 1.00   | 0.000 | -0.01       | 0.880        | 0.05         | 0.584        | 0.11           | 0.232        | -0.04        | 0.636        | -0.06                       | 0.502        | -0.05       | 0.561        | 0.05              | 0.567        | 0.16          | 0.091        |
| Age                         | 0.11         | 0.244        | -0.01  | 0.880 | 1.00        | 0.000        | <b>0.33</b>  | <b>0.000</b> | 0.14           | 0.143        | 0.03         | 0.711        | 0.01                        | 0.885        | <b>0.22</b> | <b>0.015</b> | 0.02              | 0.815        | 0.12          | 0.204        |
| BMI                         | 0.09         | 0.312        | 0.05   | 0.584 | <b>0.33</b> | <b>0.000</b> | 1.00         | 0.000        | -0.05          | 0.617        | -0.12        | 0.214        | 0.02                        | 0.796        | <b>0.23</b> | <b>0.010</b> | 0.14              | 0.131        | <b>0.39</b>   | <b>0.000</b> |
| Chromogranin A              | -0.02        | 0.847        | 0.11   | 0.232 | 0.14        | 0.143        | -0.05        | 0.617        | 1.00           | 0.000        | <b>0.38</b>  | <b>0.000</b> | <b>0.33</b>                 | <b>0.000</b> | -0.04       | 0.687        | -0.08             | 0.383        | 0.06          | 0.510        |
| Serotonin                   | <b>-0.19</b> | <b>0.036</b> | -0.04  | 0.636 | 0.03        | 0.711        | -0.12        | 0.214        | <b>0.38</b>    | <b>0.000</b> | 1.00         | 0.000        | <b>0.40</b>                 | <b>0.000</b> | -0.04       | 0.633        | -0.13             | 0.164        | -0.12         | 0.189        |
| 5-hydroxyindole acetic acid | 0.07         | 0.469        | -0.06  | 0.502 | 0.01        | 0.885        | 0.02         | 0.796        | <b>0.33</b>    | <b>0.000</b> | <b>0.40</b>  | <b>0.000</b> | 1.00                        | 0.000        | 0.00        | 0.980        | -0.12             | 0.199        | <b>-0.20</b>  | <b>0.031</b> |
| Glucose                     | <b>0.19</b>  | <b>0.038</b> | -0.05  | 0.561 | <b>0.22</b> | <b>0.015</b> | <b>0.23</b>  | <b>0.010</b> | -0.04          | 0.687        | -0.04        | 0.633        | 0.00                        | 0.980        | 1.00        | 0.000        | 0.09              | 0.336        | <b>0.24</b>   | <b>0.007</b> |
| Total cholesterol           | -0.02        | 0.825        | 0.05   | 0.567 | 0.02        | 0.815        | 0.14         | 0.131        | -0.08          | 0.383        | -0.13        | 0.164        | -0.12                       | 0.199        | 0.09        | 0.336        | 1.00              | 0.000        | <b>0.33</b>   | <b>0.000</b> |
| Triglycerides               | 0.01         | 0.904        | 0.16   | 0.091 | 0.12        | 0.204        | <b>0.39</b>  | <b>0.000</b> | 0.06           | 0.510        | -0.12        | 0.189        | <b>-0.20</b>                | <b>0.031</b> | <b>0.24</b> | <b>0.007</b> | <b>0.33</b>       | <b>0.000</b> | 1.00          | 0.000        |
| Clinical stage              | 0.01         | 0.931        | 0.02   | 0.865 | 0.08        | 0.383        | <b>-0.21</b> | <b>0.021</b> | <b>0.22</b>    | <b>0.016</b> | <b>0.31</b>  | <b>0.001</b> | <b>0.31</b>                 | <b>0.000</b> | 0.16        | 0.078        | -0.17             | 0.057        | -0.17         | 0.058        |
| Histological grading        | 0.08         | 0.376        | 0.13   | 0.161 | -0.12       | 0.202        | -0.01        | 0.873        | 0.17           | 0.071        | 0.04         | 0.631        | 0.13                        | 0.154        | 0.08        | 0.371        | -0.14             | 0.131        | 0.01          | 0.933        |
| Ki-67 proliferation index   | -0.03        | 0.736        | 0.04   | 0.677 | -0.06       | 0.491        | 0.06         | 0.521        | <b>0.22</b>    | <b>0.014</b> | <b>0.18</b>  | <b>0.047</b> | 0.11                        | 0.214        | 0.07        | 0.418        | -0.17             | 0.068        | 0.08          | 0.411        |
