# Supplementary material for: Assessment of the Concentration of Endogenous Factors Regulating Angiogenesis, VASH‐1 and VEGF‐A, in the Blood Serum of Patients with Neuroendocrine Neoplasms
Source: Hindawi journal article supplement (doi:10.1155/2022/9084393), 2022-01-01
Supplement: f2 [file 9084393.f2.pdf]

**Table S2.** Spearman rank correlation coefficients and p-values for the control group.

| Control group | VASH-1         |              | VEGF-A         |              | Age            |       | BMI            |       | Glucose        |       |
|---------------|----------------|--------------|----------------|--------------|----------------|-------|----------------|-------|----------------|-------|
|               | r <sub>s</sub> | p            | r <sub>s</sub> | p            | r <sub>s</sub> | p     | r <sub>s</sub> | p     | r <sub>s</sub> | p     |
| VASH-1        | 1.00           | 0.000        | <b>-0.49</b>   | <b>0.017</b> | 0.00           | 0.986 | -0.38          | 0.118 | 0.11           | 0.784 |
| VEGF-A        | <b>-0.49</b>   | <b>0.017</b> | 1.00           | 0.000        | 0.12           | 0.578 | 0.30           | 0.232 | -0.50          | 0.172 |
| Age           | 0.00           | 0.986        | 0.12           | 0.578        | 1.00           | 0.000 | 0.39           | 0.108 | 0.68           | 0.051 |
| BMI           | -0.38          | 0.118        | 0.30           | 0.232        | 0.39           | 0.108 | 1.00           | 0.000 | -0.43          | 0.253 |
| Glucose       | 0.11           | 0.784        | -0.50          | 0.172        | 0.68           | 0.051 | -0.43          | 0.253 | 1.00           | 0.000 |
